# Supplementary material for: Fully immunized child: coverage, timing and sequencing of routine immunization in an urban poor settlement in Nairobi, Kenya
Source: PubMed Central journal article supplement (PMC4940963; doi:10.1186/s41182-016-0013-x), 2016-05-16
Supplement: 41182_2016_13_MOESM3_ESM.pdf [file 41182_2016_13_MOESM3_ESM.pdf]

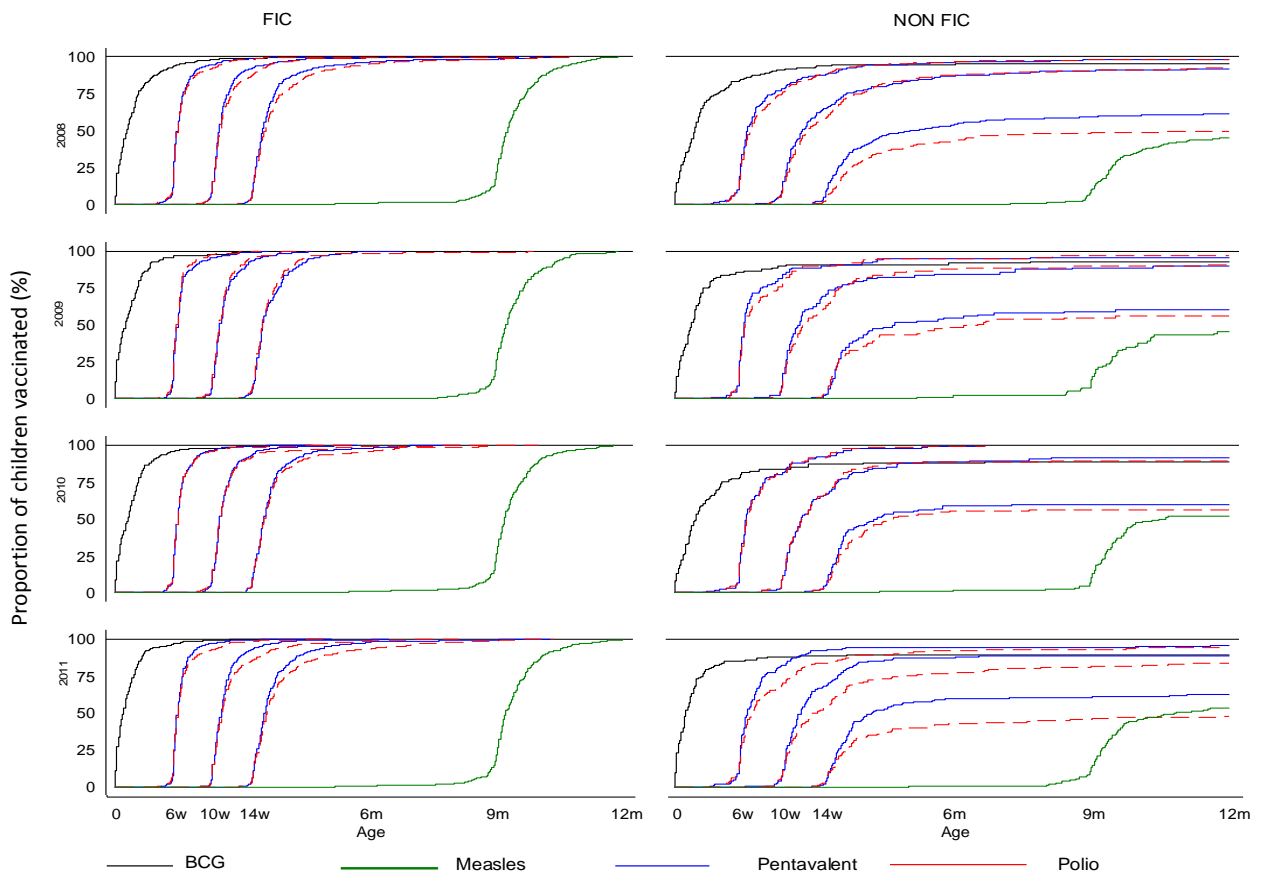

Figure A1a: Vaccine coverage curves by 12 months among children aged 12-23 months by year of visit and FIC status (2008-2011)

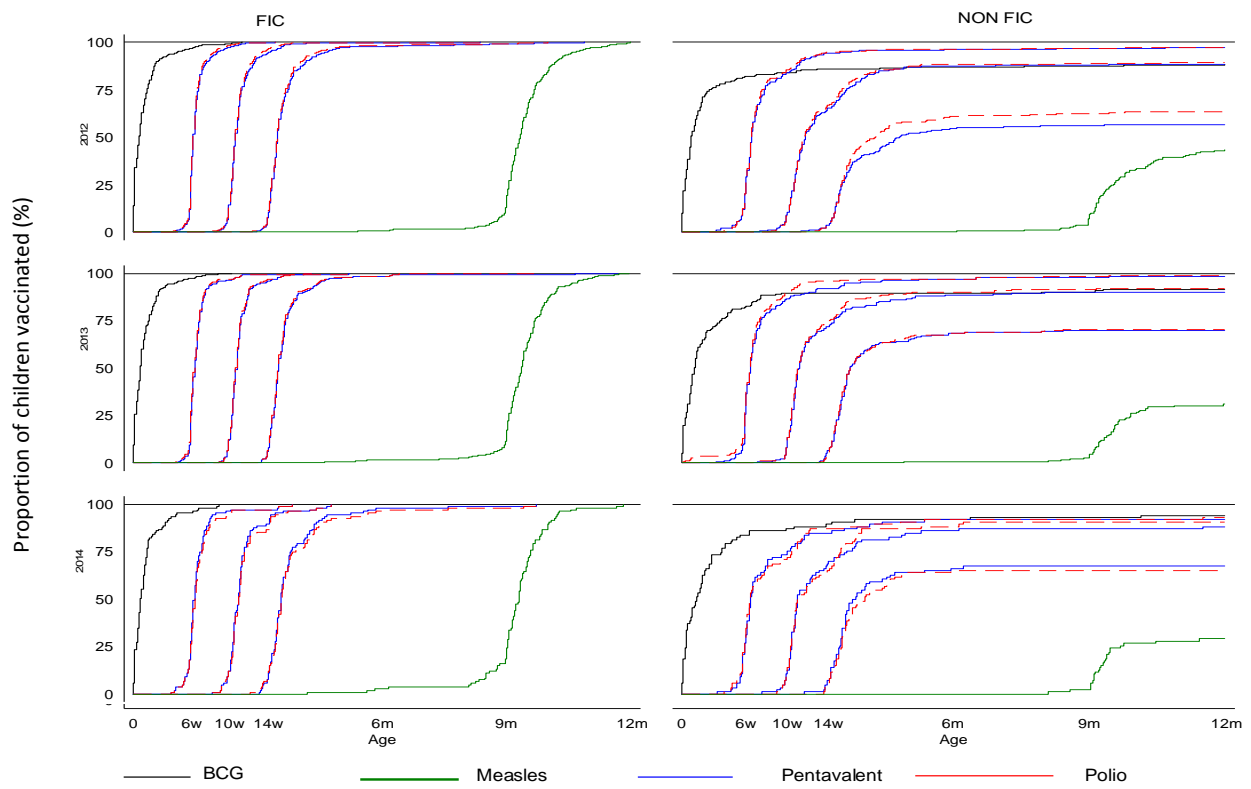

Figure A1b: Vaccine coverage curves by 12 months among children aged 12-23 months by year of visit and FIC status (2012-2014)
